# Supplementary material
Source: PubMed Central journal article supplement (PMC3014360)
Supplement: mmc1.pdf [file mmc1.pdf]

The American Journal of Human Genetics, Volume 88

**Supplemental Data**

**Mutations in the SPARC-Related Modular**

**Calcium-Binding Protein 1 Gene, *SMOC1*,**

**Cause Waardenburg Anophthalmia Syndrome**

Hana Abouzeid, Gaëlle Boisset, Tatiana Favez, Mohamed Youssef, Iman Marzouk, Nihal Shakankiri, Nader Bayoumy, Patrick Descombes, Céline Agosti, Francis L. Munier, and Daniel F. Schorderet

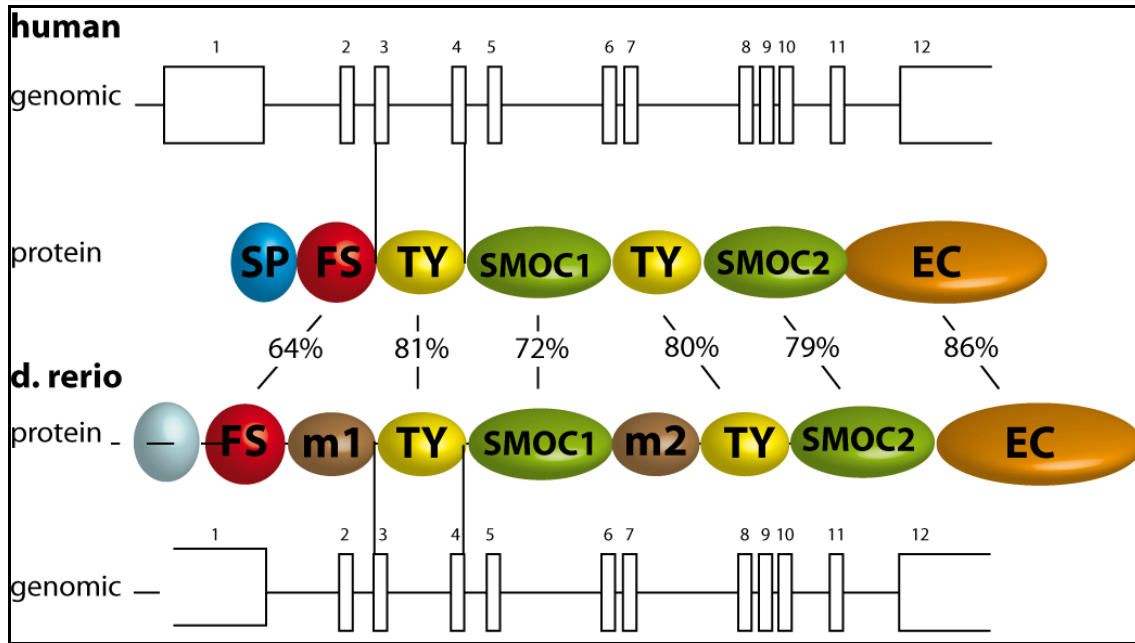

**Figure S1. Structure of the Human and Zebrafish *SMOC1* Genes and Proteins**

Primers were designed from both ends of the zebrafish LOC795519, an entry that was recently removed from Genbank. An amplicon was amplified from RNA extracted from zebrafish embryos after reverse transcription. Sequencing of this clone showed two additional modules when compared to the Genbank zebrafish reported sequence and the human sequence: a first module of 27 amino acids (m1) and a second of 17 amino acids (m2). The overall alignment score between the human and zebrafish *SMOC1* gene was 63%. The percentage of amino acid identity between each domain is indicated in the figure. The identified zebrafish clone is probably missing the sequence of the signal peptide which, together with the two additional modules, reduces the overall alignment score.

**Table S1. Summary of Genome-wide Homozygosity Mapping Regions Specific to the Two Patients**

| Chr | Begin      |             | End       |             | size<br>(nucleotides) | Number of<br>homozygous |
|-----|------------|-------------|-----------|-------------|-----------------------|-------------------------|
|     | marker     | position    | marker    | position    |                       | markers in<br>interval  |
| 2   | rs842362   | 135,057,590 | rs7578528 | 136,506,753 | 1,449,163             | 165                     |
| 14  | rs11158442 | 62,198,792  | rs4899594 | 76,031,821  | 13,833,029            | 3,123                   |
| 20  | rs6075750  | 20,953,246  | rs6036158 | 22,529,060  | 1,575,814             | 249                     |

(only regions outside of telomers, centromers and heterochromatin regions and larger than 1 Mb are shown)

**Table S2. Primers and PCR Conditions for Human *SMOC1***

---

| Exon | Forward primer (5'-3') | Reverse primer (5'-3')  |
|------|------------------------|-------------------------|
| 1    | ctccattggctttcacct     | catctcttccccctcctc      |
| 2    | tccgttcccttcaccttag    | caagcttccctgtgcaaat     |
| 3    | ggtggagtggtttctcagc    | agaaagtgaaggcgccaag     |
| 4    | cgtatgggtgatgcttgaa    | ggttctcccacaagatgcag    |
| 5    | tgtggtaagactgtttccag   | cccaggctccttctatctc     |
| 6    | tgcccttttcttttgtttc    | ctaaacaaacatccaacgttaag |
| 7    | gaagcctcaatgcctcagac   | gattttccaacccacacaa     |
| 8    | aggcctggtccttgctactt   | actcatctcccaccagacca    |
| 9    | catagatcattgctgggcagt  | gaggagacagcttcttctgcat  |
| 10   | ctggacaagaaggccttga    | cactctcacctcctca        |
| 11   | ctttctgggggcagtcatac   | gcatagcacacttccagcaa    |
| 12   | ggatttctcacaagccaac    | tgccaatgcctgtacaaaag    |

---

Annealing was done at 58°C + betain for all pairs of primers
